# Supplementary material for: How to Achieve Better Results Using PASS-Based Virtual Screening: Case Study for Kinase Inhibitors
Source: Front Chem. 2018 Apr 26;6:133. doi: 10.3389/fchem.2018.00133 (PMC5935003; doi:10.3389/fchem.2018.00133)
Supplement: Supplementary file 1 [file Table_1.XLSX]

## Sheet: I
TARGET	TRUE POSITIVE	TRUE NEGATIVE	FALSE POSITIVE	FALSE NEGATIVE	SENSITIVITY, %	SPECIFICITY, %	ACCURACY, %	BALANCED ACCURACY	PRECISION	F1	ROC AUC	N of actives	N of inactives	actives to inactives ratio	N of compounds
CHEMBL1075104	233	320	80	63	0.787162	0.8	0.79454	0.793581	0.744409	0.765189	0.869383	296	400	0.74	696
CHEMBL1075167	148	323	90	40	0.787234	0.782082	0.783694	0.784658	0.621849	0.694836	0.854451	188	413	0.455206	601
CHEMBL1824	692	765	136	115	0.857497	0.849057	0.853044	0.853277	0.835749	0.846483	0.920816	807	901	0.895671	1708
CHEMBL1841	222	447	167	73	0.752542	0.728013	0.735974	0.740278	0.570694	0.649123	0.821885	295	614	0.480456	909
CHEMBL1844	694	486	106	158	0.814554	0.820946	0.817175	0.81775	0.8675	0.840194	0.894571	852	592	1.43919	1444
CHEMBL1862	578	673	202	154	0.789617	0.769143	0.778469	0.77938	0.741026	0.76455	0.853173	732	875	0.836571	1607
CHEMBL1868	569	626	199	193	0.746719	0.758788	0.752993	0.752754	0.740885	0.743791	0.842195	762	825	0.923636	1587
CHEMBL1906	270	411	85	59	0.820669	0.828629	0.825455	0.824649	0.760563	0.789474	0.904081	329	496	0.663306	825
CHEMBL1913	339	488	170	106	0.761798	0.741641	0.749773	0.75172	0.666012	0.710692	0.8455	445	658	0.676292	1103
CHEMBL1936	573	454	102	142	0.801399	0.816547	0.808025	0.808973	0.848889	0.82446	0.881157	715	556	1.28597	1271
CHEMBL1955	255	348	117	73	0.777439	0.748387	0.760404	0.762913	0.685484	0.728571	0.845509	328	465	0.705376	793
CHEMBL1957	558	723	155	116	0.827893	0.823462	0.825387	0.825678	0.782609	0.804614	0.895353	674	878	0.767654	1552
CHEMBL1974	742	462	130	199	0.788523	0.780405	0.785388	0.784464	0.850917	0.818533	0.855069	941	592	1.58953	1533
CHEMBL1981	244	800	178	46	0.841379	0.817996	0.823344	0.829688	0.578199	0.685393	0.898681	290	978	0.296524	1268
CHEMBL1991	441	632	113	72	0.859649	0.848322	0.852941	0.853986	0.796029	0.826617	0.926126	513	745	0.688591	1258
CHEMBL2007	268	316	88	65	0.804805	0.782178	0.792402	0.793492	0.752809	0.777939	0.870826	333	404	0.824257	737
CHEMBL203	1540	1761	395	344	0.81741	0.81679	0.817079	0.8171	0.795866	0.806494	0.892595	1884	2156	0.87384	4040
CHEMBL2041	332	502	148	111	0.749436	0.772308	0.763038	0.760872	0.691667	0.719393	0.831561	443	650	0.681538	1093
CHEMBL2068	111	385	98	26	0.810219	0.797101	0.8	0.80366	0.5311	0.641618	0.876827	137	483	0.283644	620
CHEMBL2073	122	324	92	29	0.807947	0.778846	0.786596	0.793397	0.570093	0.668493	0.859216	151	416	0.362981	567
CHEMBL2147	676	1164	248	146	0.822384	0.824363	0.823635	0.823374	0.731602	0.774341	0.898587	822	1412	0.582153	2234
CHEMBL2148	505	572	169	136	0.787832	0.77193	0.779305	0.779881	0.749258	0.768061	0.853036	641	741	0.865047	1382
CHEMBL2185	854	761	211	248	0.774955	0.782922	0.778689	0.778938	0.801878	0.788186	0.856022	1102	972	1.13374	2074
CHEMBL2208	357	873	149	61	0.854067	0.854207	0.854167	0.854137	0.705534	0.772727	0.91611	418	1022	0.409002	1440
CHEMBL2250	222	331	92	69	0.762887	0.782506	0.77451	0.772696	0.707006	0.733884	0.8558	291	423	0.687943	714
CHEMBL2276	549	613	160	156	0.778723	0.793014	0.786198	0.785869	0.77433	0.776521	0.854518	705	773	0.912031	1478
CHEMBL2292	364	570	212	123	0.747433	0.7289	0.736013	0.738167	0.631944	0.684854	0.819785	487	782	0.622762	1269
CHEMBL2345	254	520	196	108	0.701657	0.726257	0.717996	0.713957	0.564444	0.625616	0.785759	362	716	0.505587	1078
CHEMBL2426	77	420	157	27	0.740385	0.727903	0.729809	0.734144	0.32906	0.455621	0.822174	104	577	0.180243	681
CHEMBL2431	315	595	89	45	0.875	0.869883	0.871648	0.872442	0.779703	0.824607	0.942166	360	684	0.526316	1044
CHEMBL2468	190	234	96	73	0.722433	0.709091	0.715008	0.715762	0.664336	0.692168	0.776328	263	330	0.79697	593
CHEMBL2527	265	531	159	92	0.742297	0.769565	0.760267	0.755931	0.625	0.678617	0.83231	357	690	0.517391	1047
CHEMBL2534	194	271	75	59	0.766798	0.783237	0.776294	0.775018	0.72119	0.743295	0.841309	253	346	0.731214	599
CHEMBL2543	84	446	141	31	0.730435	0.759796	0.754986	0.745115	0.373333	0.494118	0.841567	115	587	0.195911	702
CHEMBL258	969	916	223	243	0.799505	0.804214	0.801786	0.80186	0.812919	0.806156	0.868846	1212	1139	1.06409	2351
CHEMBL2595	157	578	202	58	0.730233	0.741026	0.738693	0.735629	0.437326	0.547038	0.81531	215	780	0.275641	995
CHEMBL2599	341	427	106	82	0.806147	0.801126	0.803347	0.803636	0.762864	0.783908	0.886944	423	533	0.793621	956
CHEMBL260	2030	1124	209	379	0.842673	0.843211	0.842865	0.842942	0.906655	0.873494	0.905881	2409	1333	1.8072	3742
CHEMBL262	1070	1100	346	352	0.752461	0.760719	0.756625	0.75659	0.75565	0.754052	0.838051	1422	1446	0.983402	2868
CHEMBL2637	406	697	140	82	0.831967	0.832736	0.832453	0.832352	0.74359	0.7853	0.899054	488	837	0.583035	1325
CHEMBL267	1114	1295	320	283	0.797423	0.801858	0.799801	0.79964	0.776848	0.787001	0.864345	1397	1615	0.865015	3012
CHEMBL2689	110	419	122	25	0.814815	0.774492	0.782544	0.794653	0.474138	0.599455	0.888054	135	541	0.249538	676
CHEMBL2695	202	435	132	69	0.745387	0.767196	0.760143	0.756292	0.60479	0.667769	0.826132	271	567	0.477954	838
CHEMBL2742	121	378	131	36	0.770701	0.742633	0.749249	0.756667	0.480159	0.591687	0.848879	157	509	0.308448	666
CHEMBL279	2524	1763	496	759	0.768809	0.780434	0.773547	0.774621	0.835762	0.800888	0.848407	3283	2259	1.4533	5542
CHEMBL2793	122	389	138	52	0.701149	0.73814	0.728959	0.719645	0.469231	0.562212	0.793916	174	527	0.330171	701
CHEMBL2801	137	487	144	42	0.765363	0.771791	0.77037	0.768577	0.487544	0.595652	0.838285	179	631	0.283677	810
CHEMBL2815	263	442	134	99	0.726519	0.767361	0.751599	0.74694	0.662469	0.693017	0.832751	362	576	0.628472	938
CHEMBL2828	193	333	101	58	0.768924	0.767281	0.767883	0.768103	0.656463	0.708257	0.842597	251	434	0.578341	685
CHEMBL2835	282	359	59	49	0.851964	0.858852	0.855808	0.855408	0.826979	0.839286	0.935999	331	418	0.791866	749
CHEMBL2850	362	516	157	113	0.762105	0.766716	0.764808	0.764411	0.697495	0.72837	0.836273	475	673	0.705795	1148
CHEMBL2938	98	463	133	28	0.777778	0.776846	0.777008	0.777312	0.424242	0.54902	0.846277	126	596	0.211409	722
CHEMBL2959	466	504	104	97	0.827709	0.828947	0.828352	0.828328	0.817544	0.822595	0.901322	563	608	0.925987	1171
CHEMBL2971	832	618	130	176	0.825397	0.826203	0.82574	0.8258	0.864865	0.84467	0.894573	1008	748	1.34759	1756
CHEMBL2973	696	566	119	145	0.827586	0.826277	0.826999	0.826932	0.853988	0.84058	0.899411	841	685	1.22774	1526
CHEMBL299	169	665	133	27	0.862245	0.833333	0.839034	0.847789	0.559603	0.678715	0.910615	196	798	0.245614	994
CHEMBL2996	373	402	79	80	0.8234	0.835759	0.829764	0.829579	0.825221	0.824309	0.895717	453	481	0.941788	934
CHEMBL3009	109	286	72	30	0.784173	0.798883	0.794769	0.791528	0.60221	0.68125	0.869298	139	358	0.388268	497
CHEMBL301	728	837	221	198	0.786177	0.791115	0.78881	0.788646	0.767123	0.776533	0.871382	926	1058	0.875236	1984
CHEMBL3024	310	636	121	49	0.86351	0.840159	0.84767	0.851834	0.719258	0.78481	0.920778	359	757	0.47424	1116
CHEMBL3032	154	243	81	48	0.762376	0.75	0.754753	0.756188	0.655319	0.704805	0.824678	202	324	0.623457	526
CHEMBL3045	150	484	89	30	0.833333	0.844677	0.841965	0.839005	0.627615	0.71599	0.937338	180	573	0.314136	753
CHEMBL3055	118	117	46	45	0.723926	0.717791	0.720859	0.720859	0.719512	0.721713	0.797678	163	163	1	326
CHEMBL308	483	609	180	147	0.766667	0.771863	0.769556	0.769265	0.728507	0.7471	0.841901	630	789	0.798479	1419
CHEMBL3116	129	96	26	41	0.758824	0.786885	0.770548	0.772854	0.832258	0.793846	0.831196	170	122	1.39344	292
CHEMBL3142	257	194	61	68	0.790769	0.760784	0.777586	0.775777	0.808176	0.799378	0.85086	325	255	1.27451	580
CHEMBL3231	466	952	199	112	0.806228	0.827107	0.820127	0.816668	0.700752	0.749799	0.892808	578	1151	0.502172	1729
CHEMBL3234	196	435	99	50	0.796748	0.814607	0.808974	0.805677	0.664407	0.724584	0.872914	246	534	0.460674	780
CHEMBL331	130	361	102	34	0.792683	0.779698	0.783094	0.78619	0.560345	0.656566	0.86854	164	463	0.354212	627
CHEMBL3357	75	223	118	38	0.663717	0.653959	0.656388	0.658838	0.388601	0.490196	0.696079	113	341	0.331378	454
CHEMBL3476	121	555	138	24	0.834483	0.800866	0.806683	0.817674	0.467181	0.59901	0.890128	145	693	0.209235	838
CHEMBL3529	77	294	113	30	0.719626	0.722359	0.72179	0.720992	0.405263	0.518519	0.796287	107	407	0.262899	514
CHEMBL3553	196	226	66	56	0.777778	0.773973	0.775735	0.775875	0.748092	0.762646	0.869272	252	292	0.863014	544
CHEMBL3582	104	268	82	29	0.781955	0.765714	0.770186	0.773835	0.55914	0.652038	0.861633	133	350	0.38	483
CHEMBL3587	410	572	102	69	0.85595	0.848665	0.851691	0.852307	0.800781	0.827447	0.914546	479	674	0.710682	1153
CHEMBL3616	139	419	46	15	0.902597	0.901075	0.901454	0.901836	0.751351	0.820059	0.942564	154	465	0.331183	619
CHEMBL3629	155	340	102	44	0.778894	0.769231	0.772231	0.774063	0.603113	0.679825	0.849741	199	442	0.450226	641
CHEMBL3650	500	828	244	137	0.784929	0.772388	0.777063	0.778659	0.672043	0.724113	0.845085	637	1072	0.594216	1709
CHEMBL3717	1159	921	162	191	0.858519	0.850416	0.854912	0.854467	0.877366	0.86784	0.920496	1350	1083	1.24654	2433
CHEMBL3778	136	806	228	45	0.751381	0.779497	0.775309	0.765439	0.373626	0.499083	0.853698	181	1034	0.175048	1215
CHEMBL3788	163	136	61	91	0.641732	0.690355	0.662971	0.666044	0.727679	0.682008	0.743535	254	197	1.28934	451
CHEMBL3797	153	1446	1162	114	0.573034	0.554448	0.556174	0.563741	0.11635	0.193426	0.5842	267	2608	0.102377	2875
CHEMBL3829	75	243	82	26	0.742574	0.747692	0.746479	0.745133	0.477707	0.581395	0.797837	101	325	0.310769	426
CHEMBL3831	107	451	150	26	0.804511	0.750416	0.760218	0.777464	0.416342	0.548718	0.833454	133	601	0.221298	734
CHEMBL3835	110	946	260	28	0.797101	0.784411	0.785714	0.790756	0.297297	0.433071	0.860826	138	1206	0.114428	1344
CHEMBL3836	111	440	178	57	0.660714	0.711974	0.701018	0.686344	0.384083	0.485777	0.755312	168	618	0.271845	786
CHEMBL3863	113	378	89	22	0.837037	0.809422	0.815615	0.823229	0.559406	0.670623	0.896748	135	467	0.289079	602
CHEMBL3905	284	390	128	90	0.759358	0.752896	0.755605	0.756127	0.68932	0.722646	0.834663	374	518	0.722008	892
CHEMBL3920	404	534	68	54	0.882096	0.887043	0.884906	0.88457	0.855932	0.868817	0.942065	458	602	0.760797	1060
CHEMBL3935	90	264	90	31	0.743802	0.745763	0.745263	0.744782	0.5	0.598007	0.828933	121	354	0.341808	475
CHEMBL3961	115	420	87	22	0.839416	0.828402	0.830745	0.833909	0.569307	0.678466	0.910364	137	507	0.270217	644
CHEMBL3982	111	279	69	29	0.792857	0.801724	0.79918	0.797291	0.616667	0.69375	0.878099	140	348	0.402299	488
CHEMBL3983	143	282	41	18	0.888199	0.873065	0.878099	0.880632	0.777174	0.828986	0.955118	161	323	0.498452	484
CHEMBL4036	239	824	231	73	0.766026	0.781043	0.777615	0.773534	0.508511	0.611253	0.858297	312	1055	0.295735	1367
CHEMBL4040	762	7888	4630	435	0.636591	0.630133	0.630696	0.633362	0.14132	0.231295	0.692828	1197	12518	0.0956223	13715
CHEMBL4045	134	411	129	51	0.724324	0.761111	0.751724	0.742718	0.509506	0.598214	0.809184	185	540	0.342593	725
CHEMBL4101	215	510	165	69	0.757042	0.755556	0.755996	0.756299	0.565789	0.64759	0.854293	284	675	0.420741	959
CHEMBL4128	393	597	108	61	0.865639	0.846809	0.854185	0.856224	0.784431	0.823037	0.929056	454	705	0.643972	1159
CHEMBL4179	412	714	165	102	0.801556	0.812287	0.808327	0.806922	0.714038	0.75527	0.888703	514	879	0.584755	1393
CHEMBL4202	141	368	113	40	0.779006	0.765073	0.768882	0.772039	0.555118	0.648276	0.840853	181	481	0.376299	662
CHEMBL4203	479	864	246	148	0.763955	0.778378	0.773172	0.771167	0.66069	0.70858	0.853701	627	1110	0.564865	1737
CHEMBL4204	146	661	243	59	0.712195	0.731195	0.727683	0.721695	0.375321	0.491582	0.799655	205	904	0.22677	1109
CHEMBL4223	155	362	111	46	0.771144	0.765328	0.767062	0.768236	0.582707	0.663812	0.856684	201	473	0.424947	674
CHEMBL4224	84	141	42	23	0.785047	0.770492	0.775862	0.777769	0.666667	0.72103	0.867652	107	183	0.584699	290
CHEMBL4225	257	455	175	96	0.728045	0.722222	0.724313	0.725134	0.594907	0.654777	0.787162	353	630	0.560317	983
CHEMBL4237	135	404	111	36	0.789474	0.784466	0.785714	0.78697	0.54878	0.647482	0.854227	171	515	0.332039	686
CHEMBL4247	449	654	125	84	0.842402	0.839538	0.840701	0.84097	0.78223	0.811201	0.908601	533	779	0.684211	1312
CHEMBL4273	110	420	79	25	0.814815	0.841683	0.835962	0.828249	0.582011	0.679012	0.890618	135	499	0.270541	634
CHEMBL4282	727	914	131	106	0.872749	0.874641	0.873802	0.873695	0.847319	0.859846	0.934678	833	1045	0.797129	1878
CHEMBL4439	386	333	66	87	0.816068	0.834586	0.824541	0.825327	0.853982	0.834595	0.91365	473	399	1.18546	872
CHEMBL4454	68	312	121	32	0.68	0.720554	0.712946	0.700277	0.359788	0.470588	0.777841	100	433	0.230947	533
CHEMBL4482	106	310	104	35	0.751773	0.748792	0.74955	0.750283	0.504762	0.603989	0.821273	141	414	0.34058	555
CHEMBL4501	247	481	165	78	0.76	0.744582	0.749743	0.752291	0.599515	0.670285	0.832589	325	646	0.503096	971
CHEMBL4523	405	536	95	76	0.841996	0.849445	0.846223	0.845721	0.81	0.825688	0.922943	481	631	0.762282	1112
CHEMBL4525	158	170	69	65	0.70852	0.711297	0.709957	0.709909	0.696035	0.702222	0.774903	223	239	0.933054	462
CHEMBL4575	67	76	47	52	0.563025	0.617886	0.590909	0.590456	0.587719	0.575107	0.660791	119	123	0.96748	242
CHEMBL4576	153	90	42	77	0.665217	0.681818	0.671271	0.673518	0.784615	0.72	0.723485	230	132	1.74242	362
CHEMBL4578	156	319	110	64	0.709091	0.74359	0.731895	0.72634	0.586466	0.641975	0.818622	220	429	0.512821	649
CHEMBL4599	204	399	100	44	0.822581	0.799599	0.807229	0.81109	0.671053	0.73913	0.895994	248	499	0.496994	747
CHEMBL4601	150	292	62	23	0.867052	0.824859	0.83871	0.845955	0.707547	0.779221	0.920202	173	354	0.488701	527
CHEMBL4630	1078	884	182	223	0.828593	0.829268	0.828897	0.828931	0.855556	0.841859	0.903402	1301	1066	1.22045	2367
CHEMBL4708	217	481	113	47	0.82197	0.809764	0.81352	0.815867	0.657576	0.73064	0.871547	264	594	0.444444	858
CHEMBL4722	1089	951	249	279	0.796053	0.7925	0.794393	0.794276	0.813901	0.804878	0.863129	1368	1200	1.14	2568
CHEMBL4816	150	1059	157	18	0.892857	0.870888	0.873555	0.881873	0.488599	0.631579	0.936369	168	1216	0.138158	1384
CHEMBL4852	186	145	58	65	0.741036	0.714286	0.729075	0.727661	0.762295	0.751515	0.778796	251	203	1.23645	454
CHEMBL4895	226	326	109	74	0.753333	0.749425	0.75102	0.751379	0.674627	0.711811	0.828421	300	435	0.689655	735
CHEMBL4897	121	334	103	32	0.79085	0.764302	0.771186	0.777576	0.540179	0.64191	0.848918	153	437	0.350114	590
CHEMBL4898	187	392	117	73	0.719231	0.770138	0.752926	0.744684	0.615132	0.663121	0.844129	260	509	0.510806	769
CHEMBL4899	103	108	28	27	0.792308	0.794118	0.793233	0.793213	0.78626	0.789272	0.864253	130	136	0.955882	266
CHEMBL4900	114	657	244	48	0.703704	0.72919	0.725306	0.716447	0.318436	0.438462	0.780138	162	901	0.1798	1063
CHEMBL5145	328	452	78	54	0.858639	0.85283	0.855263	0.855734	0.807882	0.832487	0.917228	382	530	0.720755	912
CHEMBL5147	164	522	156	48	0.773585	0.769912	0.770787	0.771748	0.5125	0.616541	0.849175	212	678	0.312684	890
CHEMBL5251	212	393	103	57	0.788104	0.792339	0.79085	0.790221	0.673016	0.726027	0.859006	269	496	0.542339	765
CHEMBL5261	104	551	184	37	0.737589	0.74966	0.747717	0.743624	0.361111	0.484848	0.808081	141	735	0.191837	876
CHEMBL5314	192	506	154	52	0.786885	0.766667	0.772124	0.776776	0.554913	0.650847	0.847128	244	660	0.369697	904
CHEMBL5330	204	384	146	67	0.752768	0.724528	0.734082	0.738648	0.582857	0.657005	0.819275	271	530	0.511321	801
CHEMBL5331	141	406	77	27	0.839286	0.84058	0.840246	0.839933	0.646789	0.73057	0.901675	168	483	0.347826	651
CHEMBL5407	253	482	109	62	0.803175	0.815567	0.811258	0.809371	0.698895	0.747415	0.893218	315	591	0.532995	906
CHEMBL5408	139	408	112	46	0.751351	0.784615	0.775887	0.767983	0.553785	0.637615	0.860338	185	520	0.355769	705
CHEMBL5469	146	527	107	31	0.824859	0.83123	0.82984	0.828045	0.577075	0.67907	0.886792	177	634	0.27918	811
CHEMBL5491	202	117	23	39	0.838174	0.835714	0.83727	0.836944	0.897778	0.866953	0.918465	241	140	1.72143	381
CHEMBL5518	169	414	179	76	0.689796	0.698145	0.695704	0.69397	0.485632	0.569983	0.777523	245	593	0.413153	838
CHEMBL5543	172	291	98	56	0.754386	0.748072	0.750405	0.751229	0.637037	0.690763	0.847934	228	389	0.586118	617
CHEMBL5568	128	385	113	37	0.775758	0.773092	0.773756	0.774425	0.53112	0.630542	0.840501	165	498	0.331325	663
CHEMBL5600	109	337	116	38	0.741497	0.743929	0.743333	0.742713	0.484444	0.586022	0.796264	147	453	0.324503	600
CHEMBL5608	167	271	108	54	0.755656	0.71504	0.73	0.735348	0.607273	0.673387	0.825428	221	379	0.583113	600
CHEMBL5627	104	307	97	33	0.759124	0.759901	0.759704	0.759513	0.517413	0.615385	0.8563	137	404	0.339109	541
CHEMBL5650	75	653	287	31	0.707547	0.694681	0.695985	0.701114	0.207182	0.320513	0.782055	106	940	0.112766	1046
CHEMBL5719	96	143	46	44	0.685714	0.756614	0.726444	0.721164	0.676056	0.680851	0.763927	140	189	0.740741	329
CHEMBL5794	82	713	261	23	0.780952	0.732033	0.736793	0.756493	0.239067	0.366071	0.830053	105	974	0.107803	1079
CHEMBL5818	170	380	104	45	0.790698	0.785124	0.786838	0.787911	0.620438	0.695297	0.87759	215	484	0.444215	699
CHEMBL6166	300	516	203	128	0.700935	0.717663	0.711421	0.709299	0.596421	0.644468	0.786683	428	719	0.595271	1147

## Sheet: MAI
TARGET	TRUE POSITIVE	TRUE NEGATIVE	FALSE POSITIVE	FALSE NEGATIVE	SENSITIVITY, %	SPECIFICITY, %	ACCURACY, %	BALANCED ACCURACY	PRECISION	F1	ROC AUC	N of actives	N of inactives	actives to inactives ratio	N of compounds
CHEMBL1075104	234	238	162	62	0.790541	0.595	0.678161	0.69277	0.590909	0.676301	0.794063	296	400	0.74	696
CHEMBL1075167	155	239	174	33	0.824468	0.578692	0.655574	0.70158	0.471125	0.599613	0.802013	188	413	0.455206	601
CHEMBL1824	735	650	251	72	0.910781	0.721421	0.81089	0.816101	0.745436	0.819855	0.901423	807	901	0.895671	1708
CHEMBL1841	224	342	272	71	0.759322	0.557003	0.622662	0.658163	0.451613	0.566372	0.750685	295	614	0.480456	909
CHEMBL1844	696	399	193	156	0.816901	0.673986	0.75831	0.745444	0.782902	0.79954	0.850445	852	592	1.43919	1444
CHEMBL1862	594	496	379	138	0.811475	0.566857	0.678283	0.689166	0.610483	0.696774	0.764882	732	875	0.836571	1607
CHEMBL1868	628	428	397	134	0.824147	0.518788	0.665406	0.671467	0.612683	0.702854	0.715532	762	825	0.923636	1587
CHEMBL1906	290	353	143	39	0.881459	0.711694	0.779394	0.796576	0.669746	0.761155	0.874467	329	496	0.663306	825
CHEMBL1913	361	370	288	84	0.811236	0.56231	0.662738	0.686773	0.55624	0.659963	0.757046	445	658	0.676292	1103
CHEMBL1936	584	381	175	131	0.816783	0.685252	0.759245	0.751018	0.769433	0.792402	0.848289	715	556	1.28597	1271
CHEMBL1955	259	251	214	69	0.789634	0.539785	0.643127	0.66471	0.547569	0.646692	0.768768	328	465	0.705376	793
CHEMBL1957	602	567	311	72	0.893175	0.645786	0.753222	0.76948	0.659365	0.758664	0.846954	674	878	0.767654	1552
CHEMBL1974	775	374	218	166	0.823592	0.631757	0.749511	0.727674	0.780463	0.801448	0.805722	941	592	1.58953	1533
CHEMBL1981	252	678	300	38	0.868966	0.693252	0.733438	0.781109	0.456522	0.598575	0.871442	290	978	0.296524	1268
CHEMBL1991	478	466	279	35	0.931774	0.625503	0.750397	0.778639	0.63144	0.752756	0.890609	513	745	0.688591	1258
CHEMBL2007	277	273	131	56	0.831832	0.675743	0.746269	0.753787	0.678922	0.747638	0.804842	333	404	0.824257	737
CHEMBL203	1691	1240	916	193	0.897558	0.575139	0.725495	0.736349	0.648638	0.753062	0.855882	1884	2156	0.87384	4040
CHEMBL2041	344	364	286	99	0.776524	0.56	0.647758	0.668262	0.546032	0.641193	0.737317	443	650	0.681538	1093
CHEMBL2068	105	351	132	32	0.766423	0.726708	0.735484	0.746566	0.443038	0.561497	0.83226	137	483	0.283644	620
CHEMBL2073	122	264	152	29	0.807947	0.634615	0.680776	0.721281	0.445255	0.574118	0.793556	151	416	0.362981	567
CHEMBL2147	715	1002	410	107	0.86983	0.709632	0.768577	0.789731	0.635556	0.734463	0.873343	822	1412	0.582153	2234
CHEMBL2148	544	419	322	97	0.848674	0.565452	0.696816	0.707063	0.628176	0.721964	0.800234	641	741	0.865047	1382
CHEMBL2185	905	553	419	197	0.821234	0.56893	0.702989	0.695082	0.683535	0.746084	0.791131	1102	972	1.13374	2074
CHEMBL2208	388	670	352	30	0.92823	0.655577	0.734722	0.791903	0.524324	0.670121	0.884887	418	1022	0.409002	1440
CHEMBL2250	218	246	177	73	0.749141	0.58156	0.64986	0.665351	0.551899	0.635569	0.758187	291	423	0.687943	714
CHEMBL2276	628	398	375	77	0.89078	0.514877	0.694181	0.702829	0.626122	0.735363	0.812667	705	773	0.912031	1478
CHEMBL2292	389	376	406	98	0.798768	0.480818	0.602837	0.639793	0.489308	0.606864	0.734091	487	782	0.622762	1269
CHEMBL2345	287	394	322	75	0.792818	0.550279	0.631725	0.671549	0.471264	0.591143	0.74504	362	716	0.505587	1078
CHEMBL2426	81	340	237	23	0.778846	0.589255	0.618209	0.68405	0.254717	0.383886	0.775955	104	577	0.180243	681
CHEMBL2431	339	544	140	21	0.941667	0.795322	0.845785	0.868494	0.707724	0.808105	0.934757	360	684	0.526316	1044
CHEMBL2468	203	201	129	60	0.771863	0.609091	0.681282	0.690477	0.611446	0.682353	0.772266	263	330	0.79697	593
CHEMBL2527	292	419	271	65	0.817927	0.607246	0.679083	0.712587	0.51865	0.634783	0.808913	357	690	0.517391	1047
CHEMBL2534	217	215	131	36	0.857708	0.621387	0.721202	0.739547	0.623563	0.72213	0.835494	253	346	0.731214	599
CHEMBL2543	98	343	244	17	0.852174	0.584327	0.628205	0.71825	0.28655	0.428884	0.802007	115	587	0.195911	702
CHEMBL258	1033	768	371	179	0.85231	0.674276	0.766057	0.763293	0.735755	0.789755	0.835268	1212	1139	1.06409	2351
CHEMBL2595	173	424	356	42	0.804651	0.54359	0.6	0.67412	0.327032	0.465054	0.775507	215	780	0.275641	995
CHEMBL2599	362	362	171	61	0.855792	0.679174	0.757322	0.767483	0.679174	0.757322	0.864142	423	533	0.793621	956
CHEMBL260	2230	829	504	179	0.925695	0.621905	0.817477	0.7738	0.815655	0.867198	0.864221	2409	1333	1.8072	3742
CHEMBL262	1225	821	625	197	0.861463	0.567773	0.713389	0.714618	0.662162	0.748778	0.799284	1422	1446	0.983402	2868
CHEMBL2637	432	569	268	56	0.885246	0.679809	0.755472	0.782527	0.617143	0.727273	0.871763	488	837	0.583035	1325
CHEMBL267	1202	920	695	195	0.860415	0.569659	0.704515	0.715037	0.633632	0.729812	0.801313	1397	1615	0.865015	3012
CHEMBL2689	110	374	167	25	0.814815	0.691312	0.715976	0.753064	0.397112	0.533981	0.840905	135	541	0.249538	676
CHEMBL2695	226	340	227	45	0.833948	0.599647	0.675418	0.716798	0.498896	0.624309	0.785268	271	567	0.477954	838
CHEMBL2742	120	309	200	37	0.764331	0.607073	0.644144	0.685702	0.375	0.503145	0.791098	157	509	0.308448	666
CHEMBL279	2811	1137	1122	472	0.856229	0.50332	0.712378	0.679775	0.714722	0.779102	0.784086	3283	2259	1.4533	5542
CHEMBL2793	140	308	219	34	0.804598	0.58444	0.639087	0.694519	0.389972	0.525328	0.766772	174	527	0.330171	701
CHEMBL2801	145	393	238	34	0.810056	0.622821	0.664198	0.716438	0.37859	0.516014	0.799941	179	631	0.283677	810
CHEMBL2815	289	355	221	73	0.798343	0.616319	0.686567	0.707331	0.566667	0.662844	0.796786	362	576	0.628472	938
CHEMBL2828	213	256	178	38	0.848606	0.589862	0.684672	0.719234	0.544757	0.663551	0.82074	251	434	0.578341	685
CHEMBL2835	306	281	137	25	0.924471	0.672249	0.783712	0.79836	0.690745	0.790698	0.905994	331	418	0.791866	749
CHEMBL2850	401	406	267	74	0.844211	0.603269	0.702962	0.72374	0.600299	0.701662	0.811645	475	673	0.705795	1148
CHEMBL2938	104	379	217	22	0.825397	0.635906	0.668975	0.730651	0.323988	0.465324	0.833347	126	596	0.211409	722
CHEMBL2959	494	421	187	69	0.877442	0.692434	0.781383	0.784938	0.725404	0.794212	0.864417	563	608	0.925987	1171
CHEMBL2971	899	534	214	109	0.891865	0.713904	0.816059	0.802884	0.807727	0.847713	0.860984	1008	748	1.34759	1756
CHEMBL2973	745	499	186	96	0.88585	0.728467	0.815203	0.807159	0.800215	0.840858	0.885586	841	685	1.22774	1526
CHEMBL299	176	531	267	20	0.897959	0.665414	0.711268	0.781686	0.397291	0.550861	0.861168	196	798	0.245614	994
CHEMBL2996	401	355	126	52	0.88521	0.738046	0.809422	0.811628	0.760911	0.818367	0.882656	453	481	0.941788	934
CHEMBL3009	115	229	129	24	0.827338	0.639665	0.692153	0.733501	0.471311	0.600522	0.804007	139	358	0.388268	497
CHEMBL301	811	637	421	115	0.87581	0.602079	0.729839	0.738945	0.658279	0.751622	0.837962	926	1058	0.875236	1984
CHEMBL3024	332	526	231	27	0.924791	0.694848	0.768817	0.80982	0.589698	0.720174	0.89666	359	757	0.47424	1116
CHEMBL3032	165	221	103	37	0.816832	0.682099	0.73384	0.749465	0.615672	0.702128	0.827436	202	324	0.623457	526
CHEMBL3045	165	433	140	15	0.916667	0.755672	0.794157	0.836169	0.540984	0.680412	0.90065	180	573	0.314136	753
CHEMBL3055	130	82	81	33	0.797546	0.503067	0.650307	0.650307	0.616114	0.695187	0.74585	163	163	1	326
CHEMBL308	549	376	413	81	0.871429	0.476553	0.651868	0.673991	0.570686	0.689698	0.787908	630	789	0.798479	1419
CHEMBL3116	128	66	56	42	0.752941	0.540984	0.664384	0.646962	0.695652	0.723164	0.74149	170	122	1.39344	292
CHEMBL3142	315	43	212	10	0.969231	0.168627	0.617241	0.568929	0.597723	0.739437	0.699083	325	255	1.27451	580
CHEMBL3231	513	774	377	65	0.887543	0.672459	0.744361	0.780001	0.576404	0.69891	0.860426	578	1151	0.502172	1729
CHEMBL3234	208	333	201	38	0.845528	0.623596	0.69359	0.734562	0.508557	0.635115	0.819132	246	534	0.460674	780
CHEMBL331	150	278	185	14	0.914634	0.600432	0.682616	0.757533	0.447761	0.601202	0.810534	164	463	0.354212	627
CHEMBL3357	85	194	147	28	0.752212	0.568915	0.614537	0.660564	0.366379	0.492754	0.735422	113	341	0.331378	454
CHEMBL3476	131	440	253	14	0.903448	0.634921	0.681384	0.769184	0.341146	0.495274	0.84638	145	693	0.209235	838
CHEMBL3529	81	208	199	26	0.757009	0.511057	0.562257	0.634033	0.289286	0.418605	0.7302	107	407	0.262899	514
CHEMBL3553	216	176	116	36	0.857143	0.60274	0.720588	0.729941	0.650602	0.739726	0.829759	252	292	0.863014	544
CHEMBL3582	115	214	136	18	0.864662	0.611429	0.681159	0.738045	0.458167	0.598958	0.773373	133	350	0.38	483
CHEMBL3587	403	513	161	76	0.841336	0.761128	0.794449	0.801232	0.714539	0.772771	0.885707	479	674	0.710682	1153
CHEMBL3616	143	397	68	11	0.928571	0.853763	0.872375	0.891167	0.677725	0.783562	0.929353	154	465	0.331183	619
CHEMBL3629	156	245	197	43	0.78392	0.554299	0.625585	0.669109	0.441926	0.565217	0.799882	199	442	0.450226	641
CHEMBL3650	530	701	371	107	0.832025	0.653918	0.720304	0.742972	0.588235	0.689207	0.803072	637	1072	0.594216	1709
CHEMBL3717	1234	766	317	116	0.914074	0.707295	0.82203	0.810684	0.795616	0.850741	0.894438	1350	1083	1.24654	2433
CHEMBL3778	145	692	342	36	0.801105	0.669246	0.688889	0.735175	0.297741	0.434132	0.810079	181	1034	0.175048	1215
CHEMBL3788	192	92	105	62	0.755906	0.467005	0.629712	0.611455	0.646465	0.696915	0.691175	254	197	1.28934	451
CHEMBL3797	194	803	1805	73	0.726592	0.307899	0.346783	0.517245	0.0970485	0.171227	0.536887	267	2608	0.102377	2875
CHEMBL3829	78	201	124	23	0.772277	0.618462	0.65493	0.695369	0.386139	0.514851	0.787814	101	325	0.310769	426
CHEMBL3831	110	362	239	23	0.827068	0.602329	0.643052	0.714699	0.315186	0.456432	0.798269	133	601	0.221298	734
CHEMBL3835	103	813	393	35	0.746377	0.674129	0.681548	0.710253	0.207661	0.324921	0.816954	138	1206	0.114428	1344
CHEMBL3836	118	272	346	50	0.702381	0.440129	0.496183	0.571255	0.25431	0.373418	0.633938	168	618	0.271845	786
CHEMBL3863	116	316	151	19	0.859259	0.67666	0.717608	0.767959	0.434457	0.577114	0.877016	135	467	0.289079	602
CHEMBL3905	294	279	239	80	0.786096	0.53861	0.642377	0.662353	0.551595	0.648291	0.744046	374	518	0.722008	892
CHEMBL3920	413	494	108	45	0.901747	0.820598	0.85566	0.861172	0.792706	0.843718	0.930365	458	602	0.760797	1060
CHEMBL3935	98	206	148	23	0.809917	0.581921	0.64	0.695919	0.398374	0.53406	0.759082	121	354	0.341808	475
CHEMBL3961	119	368	139	18	0.868613	0.725838	0.756211	0.797226	0.46124	0.602532	0.86523	137	507	0.270217	644
CHEMBL3982	110	230	118	30	0.785714	0.66092	0.696721	0.723317	0.482456	0.597826	0.803294	140	348	0.402299	488
CHEMBL3983	149	245	78	12	0.925466	0.758514	0.81405	0.84199	0.656388	0.768041	0.929869	161	323	0.498452	484
CHEMBL4036	258	655	400	54	0.826923	0.620853	0.667886	0.723888	0.392097	0.531959	0.799825	312	1055	0.295735	1367
CHEMBL4040	897	4817	7701	300	0.749373	0.384806	0.416624	0.56709	0.104327	0.183155	0.62205	1197	12518	0.0956223	13715
CHEMBL4045	140	306	234	45	0.756757	0.566667	0.615172	0.661712	0.374332	0.500894	0.701567	185	540	0.342593	725
CHEMBL4101	234	436	239	50	0.823944	0.645926	0.698644	0.734935	0.494715	0.61823	0.821028	284	675	0.420741	959
CHEMBL4128	406	527	178	48	0.894273	0.747518	0.805004	0.820895	0.695205	0.782274	0.8989	454	705	0.643972	1159
CHEMBL4179	452	578	301	62	0.879377	0.657565	0.739411	0.768471	0.600266	0.713496	0.862067	514	879	0.584755	1393
CHEMBL4202	131	288	193	50	0.723757	0.598753	0.632931	0.661255	0.404321	0.518812	0.747453	181	481	0.376299	662
CHEMBL4203	480	339	771	147	0.76555	0.305405	0.471503	0.535478	0.383693	0.511182	0.599122	627	1110	0.564865	1737
CHEMBL4204	160	568	336	45	0.780488	0.628319	0.656447	0.704403	0.322581	0.456491	0.764731	205	904	0.22677	1109
CHEMBL4223	152	267	206	49	0.756219	0.564482	0.621662	0.66035	0.424581	0.543828	0.766658	201	473	0.424947	674
CHEMBL4224	84	44	139	23	0.785047	0.240437	0.441379	0.512742	0.376682	0.509091	0.68735	107	183	0.584699	290
CHEMBL4225	280	324	306	73	0.793201	0.514286	0.614446	0.653743	0.477816	0.596379	0.738898	353	630	0.560317	983
CHEMBL4237	138	347	168	33	0.807018	0.673786	0.706997	0.740402	0.45098	0.578616	0.818708	171	515	0.332039	686
CHEMBL4247	456	589	190	77	0.855535	0.756098	0.796494	0.805816	0.705882	0.773537	0.89358	533	779	0.684211	1312
CHEMBL4273	115	349	150	20	0.851852	0.699399	0.731861	0.775625	0.433962	0.575	0.859823	135	499	0.270541	634
CHEMBL4282	791	764	281	42	0.94958	0.7311	0.828009	0.84034	0.737873	0.830446	0.912227	833	1045	0.797129	1878
CHEMBL4439	455	248	151	18	0.961945	0.621554	0.806193	0.791749	0.750825	0.843373	0.874014	473	399	1.18546	872
CHEMBL4454	71	214	219	29	0.71	0.494226	0.534709	0.602113	0.244828	0.364103	0.673557	100	433	0.230947	533
CHEMBL4482	106	280	134	35	0.751773	0.676329	0.695495	0.714051	0.441667	0.55643	0.811628	141	414	0.34058	555
CHEMBL4501	269	418	228	56	0.827692	0.647059	0.707518	0.737376	0.541247	0.654501	0.811667	325	646	0.503096	971
CHEMBL4523	434	478	153	47	0.902287	0.757528	0.820144	0.829907	0.739353	0.812734	0.888203	481	631	0.762282	1112
CHEMBL4525	172	151	88	51	0.7713	0.631799	0.699134	0.70155	0.661538	0.712215	0.789416	223	239	0.933054	462
CHEMBL4575	87	48	75	32	0.731092	0.390244	0.557851	0.560668	0.537037	0.619217	0.613582	119	123	0.96748	242
CHEMBL4576	179	63	69	51	0.778261	0.477273	0.668508	0.627767	0.721774	0.748954	0.718659	230	132	1.74242	362
CHEMBL4578	174	241	188	46	0.790909	0.561772	0.639445	0.67634	0.480663	0.597938	0.739659	220	429	0.512821	649
CHEMBL4599	198	353	146	50	0.798387	0.707415	0.737617	0.752901	0.575581	0.668919	0.839195	248	499	0.496994	747
CHEMBL4601	149	231	123	24	0.861272	0.652542	0.721063	0.756907	0.547794	0.669663	0.848895	173	354	0.488701	527
CHEMBL4630	1186	703	363	115	0.911606	0.659475	0.798057	0.785541	0.765655	0.832281	0.877279	1301	1066	1.22045	2367
CHEMBL4708	227	415	179	37	0.859848	0.698653	0.748252	0.779251	0.559113	0.677612	0.853009	264	594	0.444444	858
CHEMBL4722	1166	685	515	202	0.852339	0.570833	0.720794	0.711586	0.693635	0.764841	0.802938	1368	1200	1.14	2568
CHEMBL4816	154	955	261	14	0.916667	0.785362	0.801301	0.851014	0.371084	0.528302	0.931903	168	1216	0.138158	1384
CHEMBL4852	206	111	92	45	0.820717	0.546798	0.698238	0.683758	0.691275	0.750455	0.766559	251	203	1.23645	454
CHEMBL4895	239	252	183	61	0.796667	0.57931	0.668027	0.687989	0.566351	0.66205	0.758617	300	435	0.689655	735
CHEMBL4897	128	275	162	25	0.836601	0.629291	0.683051	0.732946	0.441379	0.577878	0.820486	153	437	0.350114	590
CHEMBL4898	205	326	183	55	0.788462	0.640472	0.690507	0.714467	0.528351	0.632716	0.795236	260	509	0.510806	769
CHEMBL4899	123	48	88	7	0.946154	0.352941	0.642857	0.649548	0.582938	0.721408	0.869174	130	136	0.955882	266
CHEMBL4900	122	473	428	40	0.753086	0.524972	0.559737	0.639029	0.221818	0.342697	0.714333	162	901	0.1798	1063
CHEMBL5145	343	376	154	39	0.897906	0.709434	0.788377	0.80367	0.690141	0.780432	0.89576	382	530	0.720755	912
CHEMBL5147	181	373	305	31	0.853774	0.550147	0.622472	0.701961	0.372428	0.518625	0.796227	212	678	0.312684	890
CHEMBL5251	212	366	130	57	0.788104	0.737903	0.755556	0.763004	0.619883	0.693944	0.835187	269	496	0.542339	765
CHEMBL5261	108	440	295	33	0.765957	0.598639	0.625571	0.682298	0.26799	0.397059	0.754263	141	735	0.191837	876
CHEMBL5314	200	415	245	44	0.819672	0.628788	0.68031	0.72423	0.449438	0.580552	0.802978	244	660	0.369697	904
CHEMBL5330	219	314	216	52	0.808118	0.592453	0.665418	0.700285	0.503448	0.620397	0.774417	271	530	0.511321	801
CHEMBL5331	143	355	128	25	0.85119	0.73499	0.764977	0.79309	0.527675	0.651481	0.868567	168	483	0.347826	651
CHEMBL5407	276	423	168	39	0.87619	0.715736	0.771523	0.795963	0.621622	0.727273	0.887328	315	591	0.532995	906
CHEMBL5408	149	324	196	36	0.805405	0.623077	0.670922	0.714241	0.431884	0.562264	0.820754	185	520	0.355769	705
CHEMBL5469	145	486	148	32	0.819209	0.766562	0.778052	0.792885	0.494881	0.617021	0.860361	177	634	0.27918	811
CHEMBL5491	231	77	63	10	0.958506	0.55	0.808399	0.754253	0.785714	0.863551	0.898874	241	140	1.72143	381
CHEMBL5518	194	310	283	51	0.791837	0.522766	0.601432	0.657301	0.406709	0.537396	0.747441	245	593	0.413153	838
CHEMBL5543	176	197	192	52	0.77193	0.506427	0.604538	0.639178	0.478261	0.590604	0.746651	228	389	0.586118	617
CHEMBL5568	127	302	196	38	0.769697	0.606426	0.647059	0.688061	0.393189	0.520492	0.766734	165	498	0.331325	663
CHEMBL5600	112	257	196	35	0.761905	0.567329	0.615	0.664617	0.363636	0.492308	0.718002	147	453	0.324503	600
CHEMBL5608	168	214	165	53	0.760181	0.564644	0.636667	0.662412	0.504505	0.606498	0.740917	221	379	0.583113	600
CHEMBL5627	99	259	145	38	0.722628	0.641089	0.661738	0.681858	0.405738	0.519685	0.76159	137	404	0.339109	541
CHEMBL5650	84	547	393	22	0.792453	0.581915	0.60325	0.687184	0.176101	0.288165	0.746598	106	940	0.112766	1046
CHEMBL5719	106	104	85	34	0.757143	0.550265	0.638298	0.653704	0.554974	0.640483	0.742725	140	189	0.740741	329
CHEMBL5794	85	565	409	20	0.809524	0.580082	0.60241	0.694803	0.172065	0.283806	0.813151	105	974	0.107803	1079
CHEMBL5818	175	344	140	40	0.813953	0.710744	0.742489	0.762349	0.555556	0.660377	0.844498	215	484	0.444215	699
CHEMBL6166	341	335	384	87	0.796729	0.465925	0.589364	0.631327	0.470345	0.5915	0.70996	428	719	0.595271	1147

## Sheet: MA
TARGET	TRUE POSITIVE	TRUE NEGATIVE	FALSE POSITIVE	FALSE NEGATIVE	SENSITIVITY, %	SPECIFICITY, %	ACCURACY, %	BALANCED ACCURACY	PRECISION	F1	ROC AUC	N of actives	N of inactives	actives to inactives ratio	N of compounds
CHEMBL1075104	231	250	150	65	0.780405	0.625	0.691092	0.702703	0.606299	0.682422	78.8041	296	400	0.74	696
CHEMBL1075167	148	250	163	40	0.787234	0.605327	0.66223	0.69628	0.475884	0.593186	79.1149	188	413	0.455206	601
CHEMBL1824	741	572	329	66	0.918216	0.63485	0.768735	0.776533	0.692523	0.789558	88.1731	807	901	0.895671	1708
CHEMBL1841	217	343	271	78	0.735593	0.558632	0.616062	0.647113	0.444672	0.554278	73.0301	295	614	0.480456	909
CHEMBL1844	681	409	183	171	0.799296	0.690878	0.754848	0.745087	0.788194	0.793706	83.7704	852	592	1.43919	1444
CHEMBL1862	587	497	378	145	0.801913	0.568	0.674549	0.684956	0.60829	0.691809	75.7996	732	875	0.836571	1607
CHEMBL1868	615	419	406	147	0.807087	0.507879	0.651544	0.657483	0.602351	0.689849	70.6678	762	825	0.923636	1587
CHEMBL1906	290	337	159	39	0.881459	0.679435	0.76	0.780447	0.64588	0.745501	86.5762	329	496	0.663306	825
CHEMBL1913	345	380	278	100	0.775281	0.577508	0.657298	0.676394	0.553772	0.646067	74.2338	445	658	0.676292	1103
CHEMBL1936	573	390	166	142	0.801399	0.701439	0.757671	0.751419	0.775372	0.788171	84.2791	715	556	1.28597	1271
CHEMBL1955	251	273	192	77	0.765244	0.587097	0.660782	0.67617	0.566591	0.651102	76.5736	328	465	0.705376	793
CHEMBL1957	599	578	300	75	0.888724	0.658314	0.758376	0.773519	0.666296	0.761602	84.5927	674	878	0.767654	1552
CHEMBL1974	752	382	210	189	0.79915	0.64527	0.739726	0.72221	0.781705	0.790331	78.5426	941	592	1.58953	1533
CHEMBL1981	248	683	295	42	0.855172	0.698364	0.734227	0.776768	0.456722	0.595438	86.5339	290	978	0.296524	1268
CHEMBL1991	477	456	289	36	0.929825	0.612081	0.741653	0.770953	0.622715	0.745895	89.3047	513	745	0.688591	1258
CHEMBL2007	274	281	123	59	0.822823	0.695545	0.753053	0.759184	0.690176	0.750685	80.3801	333	404	0.824257	737
CHEMBL203	1707	1046	1110	177	0.906051	0.485158	0.681436	0.695604	0.605964	0.726228	80.3656	1884	2156	0.87384	4040
CHEMBL2041	331	386	264	112	0.747178	0.593846	0.655993	0.670512	0.556303	0.637765	72.2356	443	650	0.681538	1093
CHEMBL2068	105	363	120	32	0.766423	0.751553	0.754839	0.758988	0.466667	0.58011	82.7636	137	483	0.283644	620
CHEMBL2073	116	265	151	35	0.768212	0.637019	0.671958	0.702616	0.434457	0.555024	78.2428	151	416	0.362981	567
CHEMBL2147	714	955	457	108	0.868613	0.676346	0.74709	0.772479	0.609735	0.716508	86.81	822	1412	0.582153	2234
CHEMBL2148	537	433	308	104	0.837754	0.584345	0.701881	0.711049	0.635503	0.722746	80.438	641	741	0.865047	1382
CHEMBL2185	873	571	401	229	0.792196	0.587449	0.696239	0.689822	0.685243	0.734848	78.9173	1102	972	1.13374	2074
CHEMBL2208	384	667	355	34	0.91866	0.652642	0.729861	0.785651	0.519621	0.663786	85.3656	418	1022	0.409002	1440
CHEMBL2250	209	246	177	82	0.718213	0.58156	0.637255	0.649887	0.541451	0.61743	72.3782	291	423	0.687943	714
CHEMBL2276	616	381	392	89	0.873759	0.492885	0.67456	0.683322	0.611111	0.719206	78.6943	705	773	0.912031	1478
CHEMBL2292	389	375	407	98	0.798768	0.47954	0.602049	0.639154	0.488693	0.606391	72.0331	487	782	0.622762	1269
CHEMBL2345	274	401	315	88	0.756906	0.560056	0.62616	0.658481	0.465195	0.576236	73.6884	362	716	0.505587	1078
CHEMBL2426	80	362	215	24	0.769231	0.627383	0.649046	0.698307	0.271186	0.401003	77.9604	104	577	0.180243	681
CHEMBL2431	338	545	139	22	0.938889	0.796784	0.845785	0.867836	0.708595	0.807646	93.0547	360	684	0.526316	1044
CHEMBL2468	194	185	145	69	0.737643	0.560606	0.639123	0.649124	0.572271	0.644518	75.1579	263	330	0.79697	593
CHEMBL2527	277	440	250	80	0.77591	0.637681	0.684814	0.706796	0.525617	0.626697	80.2584	357	690	0.517391	1047
CHEMBL2534	213	205	141	40	0.841897	0.592486	0.69783	0.717191	0.601695	0.701812	82.4036	253	346	0.731214	599
CHEMBL2543	96	347	240	19	0.834783	0.591141	0.631054	0.712962	0.285714	0.425721	79.1838	115	587	0.195911	702
CHEMBL258	1010	777	362	202	0.833333	0.682177	0.760102	0.757755	0.736152	0.781734	81.8188	1212	1139	1.06409	2351
CHEMBL2595	167	434	346	48	0.776744	0.55641	0.60402	0.666577	0.325536	0.458791	76.0513	215	780	0.275641	995
CHEMBL2599	355	364	169	68	0.839243	0.682927	0.752092	0.761085	0.677481	0.749736	86.0112	423	533	0.793621	956
CHEMBL260	2232	831	502	177	0.926526	0.623406	0.818546	0.774966	0.816386	0.867976	84.6438	2409	1333	1.8072	3742
CHEMBL262	1223	756	690	199	0.860056	0.522822	0.690028	0.691439	0.63931	0.733433	77.6029	1422	1446	0.983402	2868
CHEMBL2637	431	527	310	57	0.883197	0.62963	0.723019	0.756413	0.581646	0.701383	85.2818	488	837	0.583035	1325
CHEMBL267	1189	877	738	208	0.85111	0.543034	0.685923	0.697072	0.617021	0.715403	76.9012	1397	1615	0.865015	3012
CHEMBL2689	103	370	171	32	0.762963	0.683919	0.699704	0.723441	0.375912	0.503667	82.2058	135	541	0.249538	676
CHEMBL2695	224	325	242	47	0.826568	0.573192	0.655131	0.69988	0.480687	0.60787	77.482	271	567	0.477954	838
CHEMBL2742	117	336	173	40	0.745223	0.660118	0.68018	0.70267	0.403448	0.52349	78.0824	157	509	0.308448	666
CHEMBL279	2751	1097	1162	532	0.837953	0.485613	0.694334	0.661783	0.703041	0.764591	75.6276	3283	2259	1.4533	5542
CHEMBL2793	139	318	209	35	0.798851	0.603416	0.651926	0.701133	0.399425	0.532567	76.6805	174	527	0.330171	701
CHEMBL2801	142	404	227	37	0.793296	0.640254	0.674074	0.716775	0.384824	0.518248	79.8546	179	631	0.283677	810
CHEMBL2815	275	361	215	87	0.759669	0.626736	0.678038	0.693202	0.561224	0.64554	77.8269	362	576	0.628472	938
CHEMBL2828	212	253	181	39	0.844622	0.582949	0.678832	0.713785	0.53944	0.658385	81.5122	251	434	0.578341	685
CHEMBL2835	301	296	122	30	0.909366	0.708134	0.797063	0.80875	0.711584	0.798408	90.9965	331	418	0.791866	749
CHEMBL2850	396	393	280	79	0.833684	0.583952	0.687282	0.708818	0.585799	0.688097	80.4545	475	673	0.705795	1148
CHEMBL2938	103	402	194	23	0.81746	0.674497	0.699446	0.745978	0.346801	0.486998	82.6689	126	596	0.211409	722
CHEMBL2959	488	420	188	75	0.866785	0.690789	0.775406	0.778787	0.721893	0.787732	85.4426	563	608	0.925987	1171
CHEMBL2971	877	544	204	131	0.87004	0.727273	0.809226	0.798656	0.811286	0.839636	86.1333	1008	748	1.34759	1756
CHEMBL2973	737	488	197	104	0.876338	0.712409	0.802752	0.794373	0.789079	0.830423	88.1304	841	685	1.22774	1526
CHEMBL299	174	525	273	22	0.887755	0.657895	0.703219	0.772825	0.389262	0.541213	84.2994	196	798	0.245614	994
CHEMBL2996	400	359	122	53	0.883002	0.746362	0.812634	0.814682	0.766284	0.820513	87.9822	453	481	0.941788	934
CHEMBL3009	113	245	113	26	0.81295	0.684358	0.720322	0.748654	0.5	0.619178	80.0159	139	358	0.388268	497
CHEMBL301	802	643	415	124	0.866091	0.60775	0.728327	0.736921	0.658998	0.748483	84.1179	926	1058	0.875236	1984
CHEMBL3024	331	524	233	28	0.922006	0.692206	0.766129	0.807106	0.586879	0.717226	89.6191	359	757	0.47424	1116
CHEMBL3032	158	226	98	44	0.782178	0.697531	0.730038	0.739855	0.617188	0.689956	81.946	202	324	0.623457	526
CHEMBL3045	164	434	139	16	0.911111	0.757417	0.794157	0.834264	0.541254	0.679089	89.236	180	573	0.314136	753
CHEMBL3055	126	88	75	37	0.773006	0.539877	0.656442	0.656442	0.626866	0.692308	72.6505	163	163	1	326
CHEMBL308	549	392	397	81	0.871429	0.496831	0.663143	0.68413	0.580338	0.696701	77.9168	630	789	0.798479	1419
CHEMBL3116	124	60	62	46	0.729412	0.491803	0.630137	0.610608	0.666667	0.696629	73.7126	170	122	1.39344	292
CHEMBL3142	316	38	217	9	0.972308	0.14902	0.610345	0.560664	0.592871	0.736597	64.8314	325	255	1.27451	580
CHEMBL3231	506	793	358	72	0.875433	0.688966	0.751301	0.782199	0.585648	0.701803	85.4026	578	1151	0.502172	1729
CHEMBL3234	206	331	203	40	0.837398	0.61985	0.688462	0.728624	0.503667	0.629008	82.9984	246	534	0.460674	780
CHEMBL331	147	283	180	17	0.896341	0.611231	0.685805	0.753786	0.449541	0.598778	81.5934	164	463	0.354212	627
CHEMBL3357	82	201	140	31	0.725664	0.589443	0.623348	0.657553	0.369369	0.489552	72.2069	113	341	0.331378	454
CHEMBL3476	131	442	251	14	0.903448	0.637807	0.683771	0.770627	0.342932	0.497154	84.7017	145	693	0.209235	838
CHEMBL3529	82	207	200	25	0.766355	0.5086	0.562257	0.637477	0.29078	0.421594	72.5861	107	407	0.262899	514
CHEMBL3553	214	183	109	38	0.849206	0.626712	0.729779	0.737959	0.662539	0.744348	82.7782	252	292	0.863014	544
CHEMBL3582	113	213	137	20	0.849624	0.608571	0.674948	0.729098	0.452	0.590078	75.8357	133	350	0.38	483
CHEMBL3587	404	465	209	75	0.843424	0.689911	0.753686	0.766667	0.659054	0.739927	87.6128	479	674	0.710682	1153
CHEMBL3616	141	398	67	13	0.915584	0.855914	0.870759	0.885749	0.677885	0.779006	92.4892	154	465	0.331183	619
CHEMBL3629	161	251	191	38	0.809045	0.567873	0.642746	0.688459	0.457386	0.584392	81.0182	199	442	0.450226	641
CHEMBL3650	522	660	412	115	0.819466	0.615672	0.691633	0.717569	0.558887	0.664545	79.1112	637	1072	0.594216	1709
CHEMBL3717	1233	776	307	117	0.913333	0.716528	0.82573	0.814931	0.800649	0.853287	89.6343	1350	1083	1.24654	2433
CHEMBL3778	137	713	321	44	0.756906	0.689555	0.699588	0.723231	0.299127	0.428795	80.3381	181	1034	0.175048	1215
CHEMBL3788	185	89	108	69	0.728346	0.451777	0.607539	0.590062	0.631399	0.676417	68.416	254	197	1.28934	451
CHEMBL3797	228	391	2217	39	0.853933	0.149923	0.215304	0.501928	0.0932515	0.168142	51.5189	267	2608	0.102377	2875
CHEMBL3829	74	199	126	27	0.732673	0.612308	0.640845	0.67249	0.37	0.491694	76.0914	101	325	0.310769	426
CHEMBL3831	107	367	234	26	0.804511	0.610649	0.645777	0.70758	0.313783	0.451477	78.5133	133	601	0.221298	734
CHEMBL3835	106	817	389	32	0.768116	0.677446	0.686756	0.722781	0.214141	0.334913	81.693	138	1206	0.114428	1344
CHEMBL3836	113	237	381	55	0.672619	0.383495	0.445293	0.528057	0.228745	0.34139	60.408	168	618	0.271845	786
CHEMBL3863	111	325	142	24	0.822222	0.695931	0.724252	0.759077	0.438735	0.572165	86.5612	135	467	0.289079	602
CHEMBL3905	284	298	220	90	0.759358	0.57529	0.652466	0.667324	0.563492	0.646925	73.6634	374	518	0.722008	892
CHEMBL3920	414	484	118	44	0.90393	0.803987	0.84717	0.853958	0.778195	0.836364	92.9168	458	602	0.760797	1060
CHEMBL3935	97	211	143	24	0.801653	0.596045	0.648421	0.698849	0.404167	0.537396	75.2311	121	354	0.341808	475
CHEMBL3961	120	373	134	17	0.875912	0.7357	0.765528	0.805806	0.472441	0.613811	86.2199	137	507	0.270217	644
CHEMBL3982	104	228	120	36	0.742857	0.655172	0.680328	0.699015	0.464286	0.571429	79.3924	140	348	0.402299	488
CHEMBL3983	147	256	67	14	0.913043	0.79257	0.832645	0.852807	0.686916	0.784	93.0783	161	323	0.498452	484
CHEMBL4036	251	659	396	61	0.804487	0.624645	0.665691	0.714566	0.387944	0.523462	79.9453	312	1055	0.295735	1367
CHEMBL4040	1045	1868	10650	152	0.873016	0.149225	0.212395	0.51112	0.0893544	0.162116	56.2072	1197	12518	0.0956223	13715
CHEMBL4045	133	312	228	52	0.718919	0.577778	0.613793	0.648348	0.368421	0.487179	69.9029	185	540	0.342593	725
CHEMBL4101	229	426	249	55	0.806338	0.631111	0.683003	0.718725	0.479079	0.60105	80.2934	284	675	0.420741	959
CHEMBL4128	405	523	182	49	0.89207	0.741844	0.80069	0.816957	0.689949	0.778098	89.664	454	705	0.643972	1159
CHEMBL4179	443	569	310	71	0.861868	0.647327	0.72649	0.754597	0.588313	0.69929	84.9825	514	879	0.584755	1393
CHEMBL4202	123	303	178	58	0.679558	0.629938	0.643505	0.654748	0.408638	0.510373	73.9436	181	481	0.376299	662
CHEMBL4203	484	295	815	143	0.77193	0.265766	0.448474	0.518848	0.372594	0.502596	55.3931	627	1110	0.564865	1737
CHEMBL4204	158	576	328	47	0.770732	0.637168	0.661858	0.70395	0.325103	0.457308	76.3056	205	904	0.22677	1109
CHEMBL4223	144	275	198	57	0.716418	0.581395	0.621662	0.648907	0.421053	0.530387	73.9516	201	473	0.424947	674
CHEMBL4224	84	46	137	23	0.785047	0.251366	0.448276	0.518206	0.38009	0.512195	64.509	107	183	0.584699	290
CHEMBL4225	277	319	311	76	0.784703	0.506349	0.606307	0.645526	0.471088	0.588735	72.3405	353	630	0.560317	983
CHEMBL4237	136	336	179	35	0.795322	0.652427	0.688047	0.723874	0.431746	0.559671	81.2837	171	515	0.332039	686
CHEMBL4247	447	582	197	86	0.838649	0.747112	0.784299	0.79288	0.694099	0.759558	87.9599	533	779	0.684211	1312
CHEMBL4273	111	359	140	24	0.822222	0.719439	0.741325	0.770831	0.442231	0.57513	85.5415	135	499	0.270541	634
CHEMBL4282	790	740	305	43	0.948379	0.708134	0.814696	0.828257	0.721461	0.819502	89.9947	833	1045	0.797129	1878
CHEMBL4439	456	247	152	17	0.964059	0.619048	0.806193	0.791553	0.75	0.843663	84.2341	473	399	1.18546	872
CHEMBL4454	68	233	200	32	0.68	0.538106	0.564728	0.609053	0.253731	0.369565	66.3799	100	433	0.230947	533
CHEMBL4482	107	273	141	34	0.758865	0.65942	0.684685	0.709143	0.431452	0.550129	80.3012	141	414	0.34058	555
CHEMBL4501	256	404	242	69	0.787692	0.625387	0.679712	0.70654	0.514056	0.622114	79.8478	325	646	0.503096	971
CHEMBL4523	429	465	166	52	0.891892	0.736926	0.803957	0.814409	0.721008	0.797398	88.9956	481	631	0.762282	1112
CHEMBL4525	169	153	86	54	0.757848	0.640167	0.69697	0.699007	0.662745	0.707113	78.9059	223	239	0.933054	462
CHEMBL4575	85	52	71	34	0.714286	0.422764	0.566116	0.568525	0.544872	0.618182	62.7246	119	123	0.96748	242
CHEMBL4576	169	70	62	61	0.734783	0.530303	0.660221	0.632543	0.731602	0.733189	72.7931	230	132	1.74242	362
CHEMBL4578	168	245	184	52	0.763636	0.571096	0.636364	0.667366	0.477273	0.587413	72.6234	220	429	0.512821	649
CHEMBL4599	196	353	146	52	0.790323	0.707415	0.73494	0.748869	0.573099	0.664407	83.2342	248	499	0.496994	747
CHEMBL4601	145	244	110	28	0.83815	0.689266	0.73814	0.763708	0.568627	0.67757	84.4772	173	354	0.488701	527
CHEMBL4630	1178	704	362	123	0.905457	0.660413	0.795099	0.782935	0.764935	0.829285	87.7963	1301	1066	1.22045	2367
CHEMBL4708	216	425	169	48	0.818182	0.715488	0.747086	0.766835	0.561039	0.665639	84.7203	264	594	0.444444	858
CHEMBL4722	1149	702	498	219	0.839912	0.585	0.720794	0.712456	0.697632	0.762189	80.5326	1368	1200	1.14	2568
CHEMBL4816	153	950	266	15	0.910714	0.78125	0.796965	0.845982	0.365155	0.521295	92.7556	168	1216	0.138158	1384
CHEMBL4852	198	114	89	53	0.788845	0.561576	0.687225	0.67521	0.689895	0.736059	76.0348	251	203	1.23645	454
CHEMBL4895	228	248	187	72	0.76	0.570115	0.647619	0.665057	0.549398	0.637762	73.2421	300	435	0.689655	735
CHEMBL4897	127	241	196	26	0.830065	0.551487	0.623729	0.690776	0.393189	0.533613	79.9741	153	437	0.350114	590
CHEMBL4898	192	319	190	68	0.738462	0.626719	0.664499	0.68259	0.502618	0.598131	77.4327	260	509	0.510806	769
CHEMBL4899	124	47	89	6	0.953846	0.345588	0.642857	0.649717	0.58216	0.723032	85.9644	130	136	0.955882	266
CHEMBL4900	115	503	398	47	0.709877	0.558269	0.581373	0.634073	0.224172	0.340741	70.6451	162	901	0.1798	1063
CHEMBL5145	336	383	147	46	0.879581	0.722642	0.788377	0.801111	0.695652	0.776879	88.5298	382	530	0.720755	912
CHEMBL5147	182	380	298	30	0.858491	0.560472	0.631461	0.709481	0.379167	0.526012	79.3176	212	678	0.312684	890
CHEMBL5251	207	378	118	62	0.769517	0.762097	0.764706	0.765807	0.636923	0.69697	82.9933	269	496	0.542339	765
CHEMBL5261	100	458	277	41	0.70922	0.623129	0.636986	0.666175	0.265252	0.3861	74.5771	141	735	0.191837	876
CHEMBL5314	200	422	238	44	0.819672	0.639394	0.688053	0.729533	0.456621	0.58651	79.7917	244	660	0.369697	904
CHEMBL5330	213	309	221	58	0.785978	0.583019	0.651685	0.684498	0.490783	0.604255	77.2245	271	530	0.511321	801
CHEMBL5331	139	354	129	29	0.827381	0.732919	0.757296	0.78015	0.518657	0.637615	85.4746	168	483	0.347826	651
CHEMBL5407	274	425	166	41	0.869841	0.71912	0.771523	0.794481	0.622727	0.725828	88.2768	315	591	0.532995	906
CHEMBL5408	144	323	197	41	0.778378	0.621154	0.662411	0.699766	0.422287	0.547529	81.6762	185	520	0.355769	705
CHEMBL5469	142	473	161	35	0.80226	0.746057	0.758323	0.774158	0.468647	0.591667	83.1155	177	634	0.27918	811
CHEMBL5491	231	77	63	10	0.958506	0.55	0.808399	0.754253	0.785714	0.863551	90.9959	241	140	1.72143	381
CHEMBL5518	191	332	261	54	0.779592	0.559865	0.624105	0.669728	0.422566	0.548063	74.1966	245	593	0.413153	838
CHEMBL5543	175	195	194	53	0.767544	0.501285	0.599676	0.634415	0.474255	0.586265	74.3974	228	389	0.586118	617
CHEMBL5568	120	302	196	45	0.727273	0.606426	0.636501	0.666849	0.379747	0.49896	73.4124	165	498	0.331325	663
CHEMBL5600	107	272	181	40	0.727891	0.600442	0.631667	0.664166	0.371528	0.491954	70.6274	147	453	0.324503	600
CHEMBL5608	163	213	166	58	0.737557	0.562005	0.626667	0.649781	0.495441	0.592727	73.2345	221	379	0.583113	600
CHEMBL5627	95	265	139	42	0.693431	0.655941	0.665434	0.674686	0.405983	0.512129	75.8329	137	404	0.339109	541
CHEMBL5650	82	565	375	24	0.773585	0.601064	0.618547	0.687324	0.179431	0.291297	73.061	106	940	0.112766	1046
CHEMBL5719	105	103	86	35	0.75	0.544974	0.632219	0.647487	0.549738	0.634441	74.6485	140	189	0.740741	329
CHEMBL5794	84	582	392	21	0.8	0.597536	0.617238	0.698768	0.176471	0.289157	80.9421	105	974	0.107803	1079
CHEMBL5818	174	336	148	41	0.809302	0.694215	0.729614	0.751759	0.540373	0.648045	83.8776	215	484	0.444215	699
CHEMBL6166	337	358	361	91	0.787383	0.497914	0.605929	0.642648	0.482808	0.598579	70.5617	428	719	0.595271	1147
